# Supplementary material
Source: PubMed Central journal article supplement (PMC7259370)
Supplement: suppl_tab1_deaa069.pdf [file suppl_tab1_deaa069.pdf]

**Supplementary Table S1** Associations of childhood obesity with menstrual irregularity in adulthood in the Childhood Determinants of Adult Health Study and the Babies substudy of the Bogalusa Heart Study.<sup>a</sup>

| Childhood obesity | CDAH                           |           |                       |           | BBS                            |           |                                    |           |
|-------------------|--------------------------------|-----------|-----------------------|-----------|--------------------------------|-----------|------------------------------------|-----------|
|                   | Unadjusted model<br>(n = 1010) |           | Model I<br>(n = 1010) |           | Unadjusted model<br>(n = 1238) |           | Model I <sup>b</sup><br>(n = 1238) |           |
|                   | RR                             | 95% CI    | RR                    | 95% CI    | RR                             | 95% CI    | RR                                 | 95% CI    |
| BMI z-score       | 1.09                           | 0.91–1.31 | 1.13                  | 0.93–1.36 | 1.09                           | 0.99–1.20 | 1.10                               | 0.99–1.21 |
| BMI category      |                                |           |                       |           |                                |           |                                    |           |
| Normal            | Ref.                           | —         | Ref.                  | —         | Ref.                           | —         | Ref.                               | —         |
| Overweight        | 1.45                           | 0.96–2.20 | 1.54                  | 1.01–2.33 | 1.03                           | 0.85–1.26 | 1.04                               | 0.85–1.27 |
| Obese             | 2.14                           | 1.28–3.56 | 2.23                  | 1.31–3.81 | 1.38                           | 1.06–1.81 | 1.38                               | 1.05–1.83 |

Model I: adjust for childhood age, age at menarche, highest parental education and own-education.

<sup>a</sup>Use definition of US Centres for Disease Control and Prevention (CDC) growth reference to calculate BMI z-score and to classify childhood weight status of overweight and obesity.

<sup>b</sup>Model I further adjust for race in the Babies substudy of Bogalusa Heart Study (BBS).

CDAH: Childhood Determinants of Adult Health Study, RR: relative risk.
