# Supplementary material
Source: PubMed Central journal article supplement (PMC7259370)
Supplement: suppl_tab2_deaa069.pdf [file suppl_tab2_deaa069.pdf]

**Supplementary Table SII** Associations of childhood obesity with PCOS in CDAH and BBS.<sup>a</sup>

| Childhood obesity | CDAH                           |           |                       |           | BBS                            |           |                                    |           |
|-------------------|--------------------------------|-----------|-----------------------|-----------|--------------------------------|-----------|------------------------------------|-----------|
|                   | Unadjusted model<br>(n = 1516) |           | Model I<br>(n = 1516) |           | Unadjusted model<br>(n = 1247) |           | Model I <sup>b</sup><br>(n = 1247) |           |
|                   | RR                             | 95% CI    | RR                    | 95% CI    | RR                             | 95% CI    | RR                                 | 95% CI    |
| BMI z-score       | 1.22                           | 0.93–1.60 | 1.25                  | 0.94–1.65 | 1.35                           | 1.10–1.66 | 1.49                               | 1.21–1.83 |
| BMI category      |                                |           |                       |           |                                |           |                                    |           |
| Normal            | Ref.                           | —         | Ref.                  | —         | Ref.                           | —         | Ref.                               | —         |
| Overweight        | 1.68                           | 0.91–3.12 | 1.78                  | 0.96–2.30 | 1.49                           | 1.04–2.13 | 1.67                               | 1.15–2.41 |
| Obese             | 3.51                           | 1.58–7.79 | 3.91                  | 1.76–8.67 | 2.14                           | 1.36–3.38 | 2.57                               | 1.60–4.43 |

Model I: adjust for childhood age, age at menarche, highest parental education and own-education.

<sup>a</sup>Use definition of US CDC growth reference to calculated BMI z-score and to classify childhood weight status of overweight and obesity.

<sup>b</sup>Model I further adjust for race in BBS.

PCOS, polycystic ovary syndrome
