# Supplementary material
Source: PubMed Central journal article supplement (PMC7259370)
Supplement: suppl_tab3_deaa069.pdf [file suppl_tab3_deaa069.pdf]

**Supplementary Table SIII** Associations of childhood obesity with PCOS in BBS, by race.<sup>a</sup>

| Race and childhood obesity | n   | PCOS             |           |         |           |
|----------------------------|-----|------------------|-----------|---------|-----------|
|                            |     | Unadjusted model |           | Model I |           |
|                            |     | RR               | 95% CI    | RR      | 95% CI    |
| <i>White</i>               | 730 |                  |           |         |           |
| BMI z-score                |     | 1.57             | 1.25–1.97 | 1.63    | 1.29–2.06 |
| BMI category               |     |                  |           |         |           |
| Normal                     |     | Ref.             | —         | Ref.    | —         |
| Overweight                 |     | 1.80             | 1.18–2.75 | 1.91    | 1.22–2.97 |
| Obese                      |     | 3.10             | 1.81–5.29 | 3.27    | 1.86–5.73 |
| <i>Black</i>               | 517 |                  |           |         |           |
| BMI z-score                |     | 1.01             | 0.68–1.49 | 1.05    | 0.71–1.57 |
| BMI category               |     |                  |           |         |           |
| Normal                     |     | Ref.             | —         | Ref.    | —         |
| Overweight                 |     | 0.99             | 0.43–2.30 | 1.07    | 0.49–2.32 |
| Obese                      |     | 1.21             | 0.44–3.35 | 1.25    | 0.44–3.57 |

Model I: adjust for childhood age, age at menarche, highest parental education and own-education.

<sup>a</sup>Use definition of US CDC growth reference to calculate BMI z-score and to classify childhood weight status of overweight and obesity.
