# Supplementary material
Source: PubMed Central journal article supplement (PMC7259370)
Supplement: suppl_tab4_deaa069.pdf [file suppl_tab4_deaa069.pdf]

**Supplementary Table SIV** Associations of the z-score change from weight-at-birth to BMI-in-childhood in BBS.

| The z-score change from<br>weight-at-birth to<br>BMI-in-childhood | Menstrual irregularity |                  |           |         |           | PCOS     |                  |           |         |           |
|-------------------------------------------------------------------|------------------------|------------------|-----------|---------|-----------|----------|------------------|-----------|---------|-----------|
|                                                                   | <i>n</i>               | Unadjusted model |           | Model I |           | <i>n</i> | Unadjusted model |           | Model I |           |
|                                                                   |                        | RR               | 95% CI    | RR      | 95% CI    |          | RR               | 95% CI    | RR      | 95% CI    |
| <i>Overall</i>                                                    | 780                    |                  |           |         |           | 788      |                  |           |         |           |
| Δ birth weight-BMI (z-score)                                      |                        | 1.11             | 1.02–1.22 | 1.13    | 1.03–1.25 |          | 1.26             | 1.03–1.55 | 1.43    | 1.18–1.73 |
| <i>White race</i>                                                 | 467                    |                  |           |         |           | 471      |                  |           |         |           |
| Δ birth weight-BMI (z-score)                                      |                        | 1.15             | 1.02–1.30 | 1.17    | 1.03–1.33 |          | 1.37             | 1.11–1.68 | 1.46    | 1.18–1.80 |
| <i>Black race</i>                                                 | 313                    |                  |           |         |           | 317      |                  |           |         |           |
| Δ birth weight-BMI (z-score)                                      |                        | 1.07             | 0.93–1.24 | 1.08    | 0.94–1.25 |          | 1.29             | 0.82–2.02 | 1.28    | 0.85–1.93 |

Model I: adjusted for age at menarche, highest parental education and own-education.
