# Supplementary material
Source: PubMed Central journal article supplement (PMC7259370)
Supplement: suppl_tab5_deaa069.pdf [file suppl_tab5_deaa069.pdf]

**Supplementary Table SV** Associations of adiposity in childhood with menstrual irregularity in adulthood in BBS in women under aged 40 years at follow-up.

| Childhood adiposity              | BBS              |           |         |                      |           |         |
|----------------------------------|------------------|-----------|---------|----------------------|-----------|---------|
|                                  | Unadjusted model |           |         | Model I <sup>a</sup> |           |         |
|                                  | (n = 431)        |           | P value | (n = 431)            |           | P value |
|                                  | RR               | 95% CI    |         | RR                   | 95% CI    |         |
| BMI z-score                      | 1.10             | 0.96–1.27 | 0.166   | 1.09                 | 0.94–1.27 | 0.237   |
| BMI category                     |                  |           |         |                      |           |         |
| Normal                           | Ref.             | —         | —       | Ref.                 | —         | —       |
| Overweight                       | 1.03             | 0.70–1.53 | 0.873   | 1.03                 | 0.70–1.52 | 0.874   |
| Obese                            | 1.51             | 0.97–2.36 | 0.070   | 1.50                 | 0.94–2.41 | 0.090   |
| WHtR, per 0.01 unit <sup>b</sup> | 1.03             | 1.00–1.06 | 0.075   | 1.03                 | 0.99–1.06 | 0.124   |
| WHtR category <sup>b</sup>       |                  |           |         |                      |           |         |
| <0.5                             | Ref.             | —         | —       | Ref.                 | —         | —       |
| ≥0.5                             | 1.60             | 1.05–2.43 | 0.028   | 1.55                 | 0.99–2.41 | 0.055   |

<sup>a</sup>Model I: adjust for childhood age, age at menarche, race, highest parental education and own-education

<sup>b</sup>n = 291

WHtR, waist/height ratio
